# Supplementary material for: VIS Atlas: A Database of Virus Integration Sites in Human Genome from NGS Data to Explore Integration Patterns
Source: PubMed Central journal article supplement (PMC10626058; doi:10.1016/j.gpb.2023.02.005), 2023-02-16
Supplement: mmc1.pdf [file mmc1.pdf]

A

| Sequence Display       |                                                                                                        |                                                                                                              |
|------------------------|--------------------------------------------------------------------------------------------------------|--------------------------------------------------------------------------------------------------------------|
| Junction sequence      | > AAAAAAGGAAAGTGTGCCTATTCTTTTATGCATTGTATTTTCAACATATCAAACCTATTGGGGTCAGGTAATGTATTCTAAATACCCCTGTATTGTAATC | Strand: +/-                                                                                                  |
| Virus sequence         | CAAACCTATTGGGGTCAGGTAATGTATTCTAAATACCCCTGTATTGTAATC                                                    | Strand: -                                                                                                    |
| Human sequence         | AAAAAAGGAAAGTGTGCCTATTCTTTTATGCATTGTATTTTCAACATATCA                                                    | Strand: +                                                                                                    |
| MH patterns            | <pre> TTCACATAT.CA.AACTTATTGG TTCACATAT.CA.AACTTATTGG TTCACATAT.CA.AACTTATTGG           </pre>         | junctional microhomology/Snap-back<br>junctional microhomology/Loop-out<br>junctional microhomology/Loop-out |
| <b>Microhomologies</b> |                                                                                                        |                                                                                                              |

B

| Sequence Display                                                                                                                                                                                                                                                      |                                                                                                  |                              |
|-----------------------------------------------------------------------------------------------------------------------------------------------------------------------------------------------------------------------------------------------------------------------|--------------------------------------------------------------------------------------------------|------------------------------|
| Junction sequence                                                                                                                                                                                                                                                     | > CTCCTCTTAGACAGATAGACACACACACACACACGCACACATCCAGTTCAGTTTCGCGAGGTGTGGAGGCTGCAATACAGATGGGTCAGTGAAG | Strand: +/-                  |
| Virus sequence                                                                                                                                                                                                                                                        | TCCAGTTTCGCGAGGTGTGGAGGCTGCAATACAGATGGGTCAGTGAAG                                                 | Strand: -                    |
| Human sequence                                                                                                                                                                                                                                                        | CTCCTCTTAGACAGATAGACACACACACACACACGCACACATCCAGT                                                  | Strand: +                    |
| MH patterns                                                                                                                                                                                                                                                           | CACATCCAGT-TCAGTTCT                                                                              | apparent blunt join/Loop-out |
| <p>The end-join between human and virus sequence was displayed in three ways (junctional microhomology within dots; dash for apparent blunt join; lowercase for short insertion). The repeat, including primers (red) and microhomologies (blue), was underlined.</p> |                                                                                                  |                              |
